# Supplementary material for: Single-Atom Alloy Pd1Ag10/CeO2–ZrO2 as a Promising Catalyst for Selective Alkyne Hydrogenation
Source: MDPI journal article supplement (doi:10.3390/inorganics11040150), 2023-04-01
Supplement: s1 [file s1]

# Single-Atom Alloy Pd<sub>1</sub>Ag<sub>10</sub>/CeO<sub>2</sub>–ZrO<sub>2</sub> as a Promising Catalyst for Selective Alkyne Hydrogenation

Pavel V. Markov <sup>1</sup>, Galina O. Bragina <sup>1</sup>, Nadezhda S. Smirnova <sup>1</sup>, Galina N. Baeva <sup>1</sup>, Igor S. Mashkovsky <sup>1,\*</sup>, Evgeny Y. Gerasimov <sup>2</sup>, Andrey V. Bukhtiyarov <sup>2</sup>, Yan. V. Zubavichus <sup>2</sup> and Alexander Y. Stakheev <sup>1,\*</sup>

<sup>1</sup> N. D. Zelinsky Institute of Organic Chemistry RAS, Leninsky Prospect 47, 119991 Moscow, Russia

<sup>2</sup> G. K. Boreskov Institute of Catalysis, Siberian Branch of the Russian Academy of Sciences, Academician Lavrentiev Prospect 5, 630090 Novosibirsk, Russia

\* Correspondence: im@ioc.ac.ru (I.S.M.); st@ioc.ac.ru (A.Y.S.)

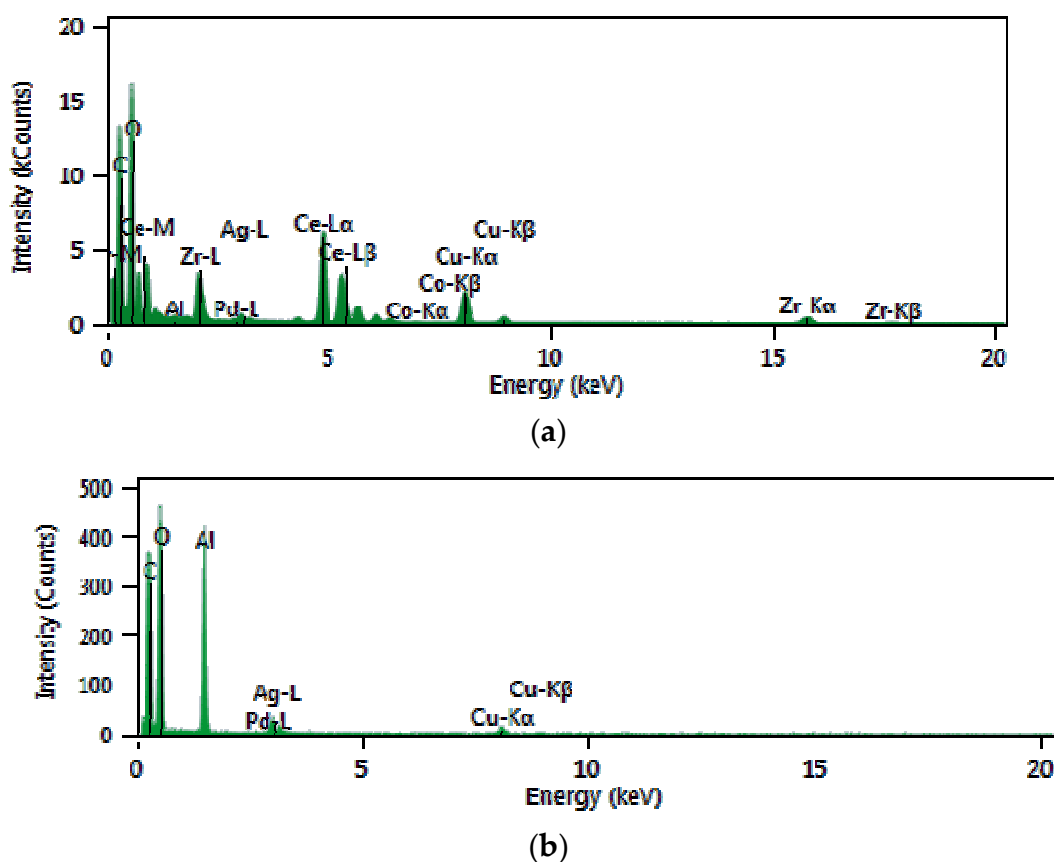

**Figure S1.** EDX spectrum of PdAg<sub>10</sub>/CZ (a) and PdAg<sub>10</sub>/A (b) catalysts.

**Table S1.** Quantitative analysis of EDX-spectrum of PdAg<sub>10</sub>/CZ catalyst.

| Element | Family | at. % | wt. % | Mass Error (%) |
|---------|--------|-------|-------|----------------|
| O       | K      | 72.57 | 24.78 | 2.08           |
| Zr      | K      | 7.09  | 13.80 | 2.03           |
| Pd      | L      | 0.21  | 0.48  | 0.05           |
| Ag      | L      | 2.08  | 4.79  | 0.31           |
| Ce      | L      | 18.78 | 56.15 | 7.29           |

**Table S2.** Quantitative analysis of EDX-spectrum of PdAg<sub>10</sub>/A catalyst.

| Element | Family | at. % | wt. % | Mass Error (%) |
|---------|--------|-------|-------|----------------|
| O       | K      | 60.35 | 45.15 | 4.42           |
| Al      | K      | 38.06 | 48.05 | 10.40          |
| Pd      | L      | 0.11  | 0.55  | 0.10           |
| Ag      | L      | 1.24  | 6.26  | 1.11           |

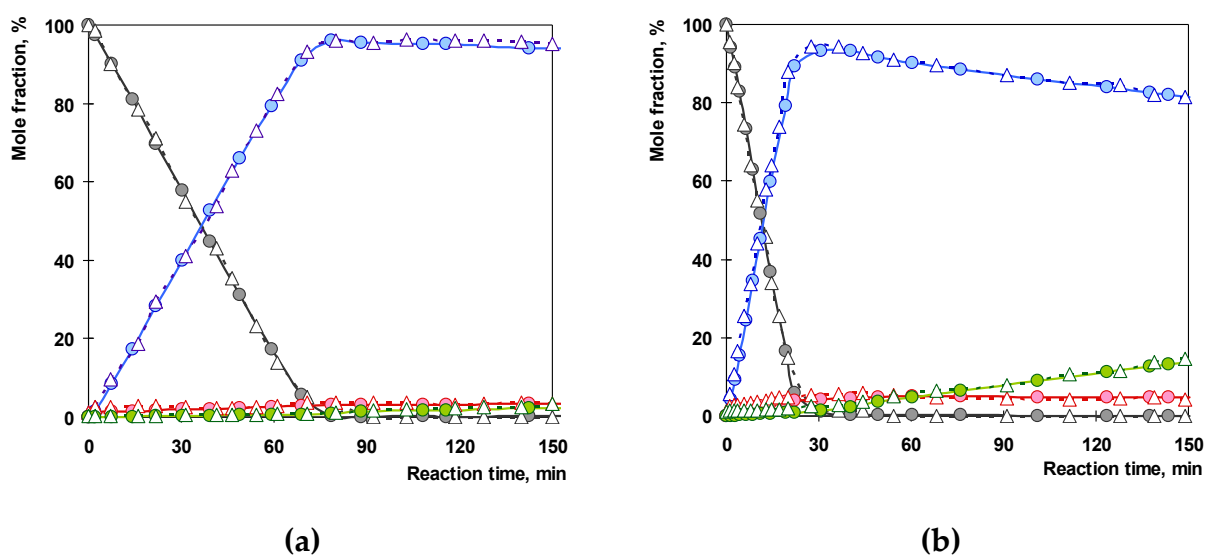**Figure S2.** Products distribution of DPA hydrogenation over PdAg<sub>10</sub>/A (a) and PdAg<sub>10</sub>/CZ (b) after 1<sup>st</sup> and 5<sup>th</sup> reaction runs.

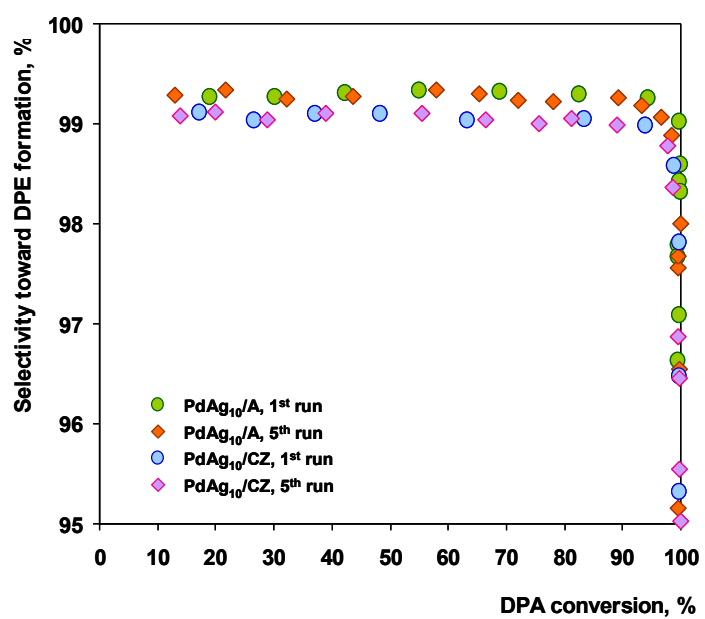

**Figure S3.** Comparison of selectivity toward stilbene formation for PdAg<sub>10</sub>/A and PdAg<sub>10</sub>/CZ catalysts after 1st and 5th reaction runs.
